# Supplementary material for: Proteinase-activated receptors (PARs) – focus on receptor-receptor-interactions and their physiological and pathophysiological impact
Source: Springer Nature journal article supplement (doi:10.1186/1478-811x-11-86), 2013-11-11
Supplement: 12964_2013_372_MOESM1_ESM.pdf [file 12964_2013_372_MOESM1_ESM.pdf]

**A**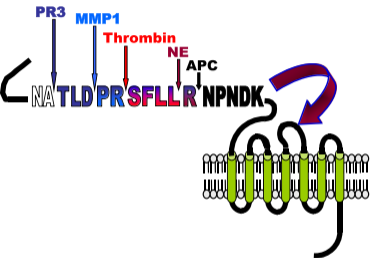**PAR<sub>1</sub> Response**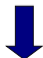**PR3**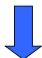**MMP1**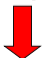**Thrombin**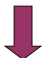**NE**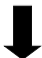**APC****B**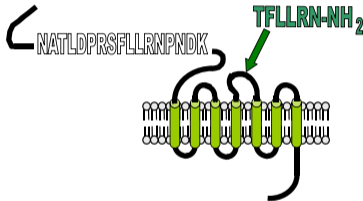**PAR<sub>1</sub> Response**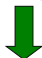**Activating peptide: TFLLRN-NH<sub>2</sub>**
