# Supplementary figures and images for: Proteinase-activated receptors (PARs) – focus on receptor-receptor-interactions and their physiological and pathophysiological impact
Source: Springer Nature journal article supplement (doi:10.1186/1478-811x-11-86), 2013-11-11

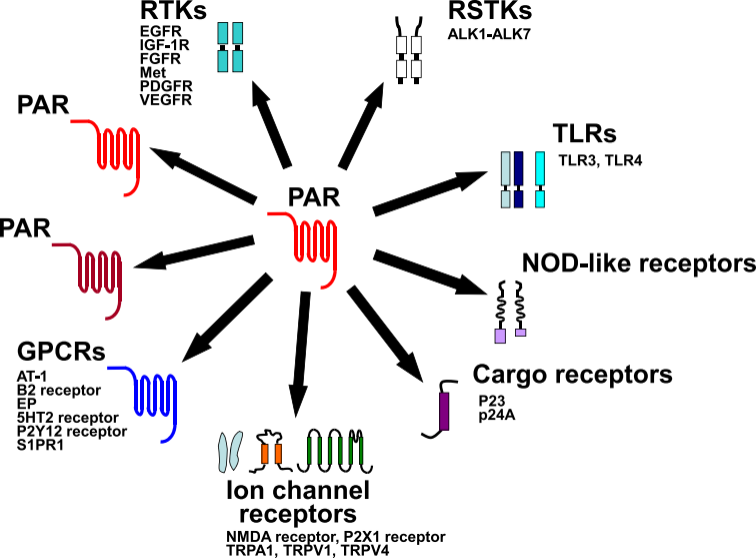

Supplement: 12964_2013_372_MOESM2_ESM.pdf [file 12964_2013_372_MOESM2_ESM.pdf]

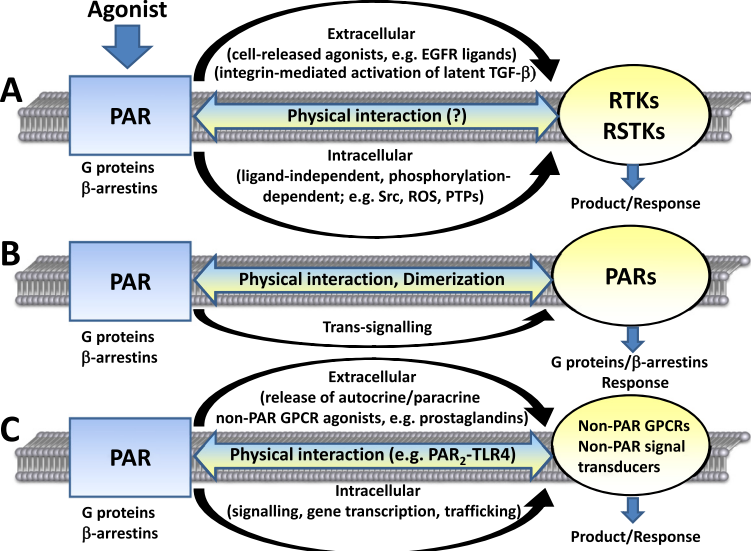

Supplement: 12964_2013_372_MOESM3_ESM.pdf [file 12964_2013_372_MOESM3_ESM.pdf]
